# Supplementary material
Source: PubMed Central journal article supplement (PMC6641604)
Supplement: ao7b00537_si_001.pdf [file ao7b00537_si_001.pdf]

# Amplified Chemiluminescence Signal for Sensing Fluoride Ions

Ilke S. Turan,<sup>†</sup> Ozlem Seven,<sup>†</sup> Seylan Ayan,<sup>‡</sup> Engin U. Akkaya<sup>\*,†,‡</sup>

<sup>†</sup> UNAM-National Nanotechnology Research Center, Bilkent University, 06800, Ankara, Turkey.

<sup>‡</sup> Department of Chemistry, Bilkent University, 06800, Ankara, Turkey.

[eua@fen.bilkent.edu.tr](mailto:eua@fen.bilkent.edu.tr)

## Supporting Information

### Table of Contents

|                                                                                 |     |
|---------------------------------------------------------------------------------|-----|
| Chemiluminescence Spectra .....                                                 | S2  |
| Detection Limit Measurements.....                                               | S4  |
| Copies of <sup>1</sup> H and <sup>13</sup> C NMR Spectra of the compounds ..... | S5  |
| Copies of HRMS spectra of the compounds.....                                    | S12 |

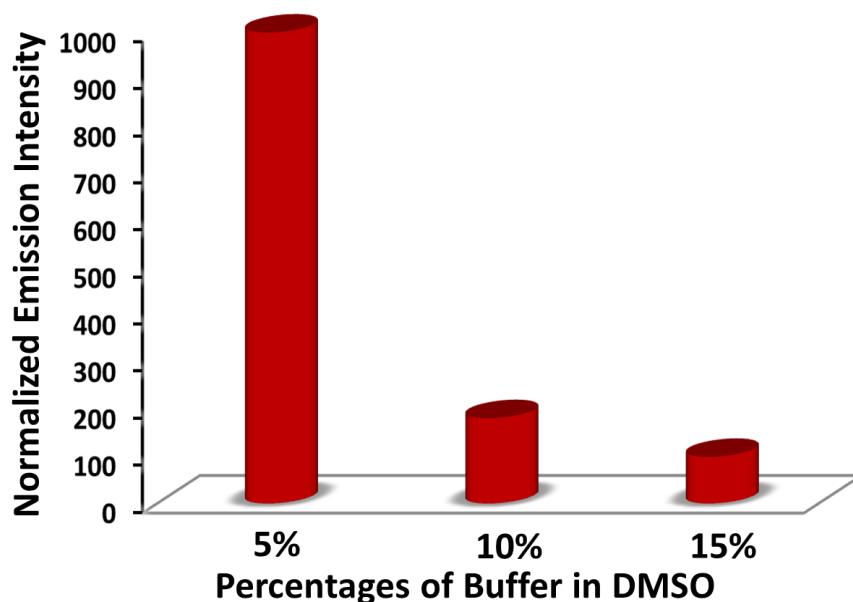

**Figure S1.** Normalized Chemiluminescence Emission Intensity of compound **10** in the presence of  $F^-$  (0.5 mM) at different percentages of buffer ( $Na_2CO_3$ - $NaHCO_3$  buffer, 20mM, pH 9.0) in DMSO. Probe concentration is 500  $\mu M$

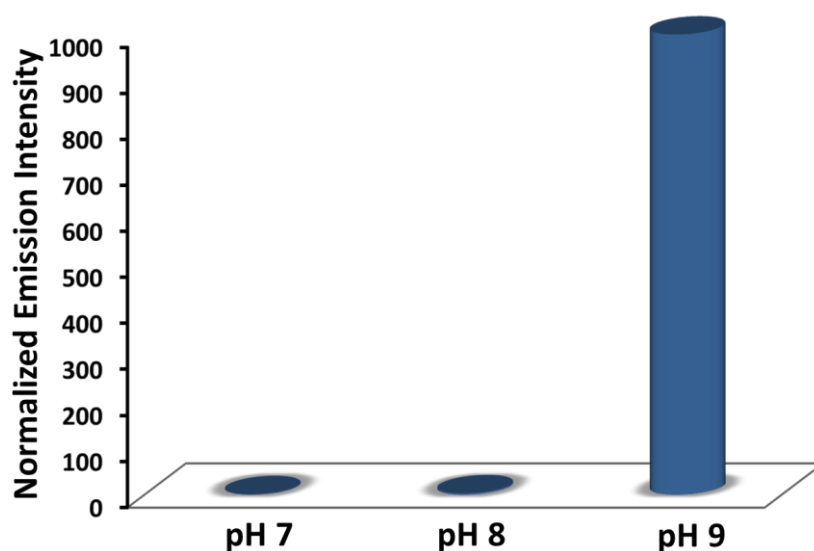

**Figure S2.** pH-dependent normalized chemiluminescence emission intensity of compound **10** in the presence of  $F^-$  (0.5 mM). Probe concentration is 500  $\mu M$  in DMSO/Buffer (95/5 for pH 7-8, 20mM Kpi buffer; for pH 9, 20mM  $Na_2CO_3$ - $NaHCO_3$  buffer).

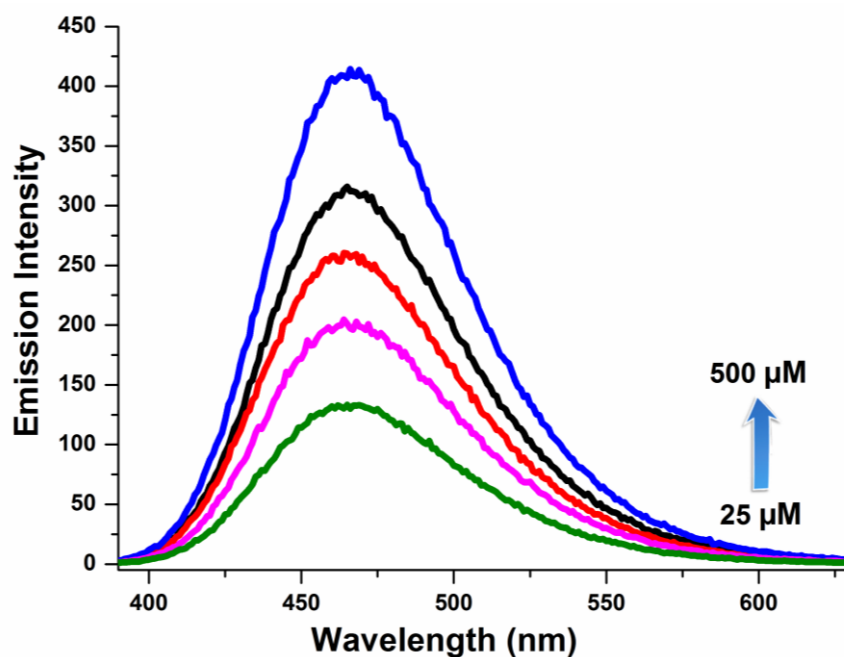

**Figure S3.** Chemiluminescence spectra of compound **10** in the presence of increasing  $F^-$  concentrations. Probe concentration is  $500 \mu M$  in DMSO/Buffer (95/5 for pH 9, 20mM  $Na_2CO_3$ - $NaHCO_3$  buffer). [The blank was shown in green line and chemiluminescence was recorded subsequent to the addition of TBAF].

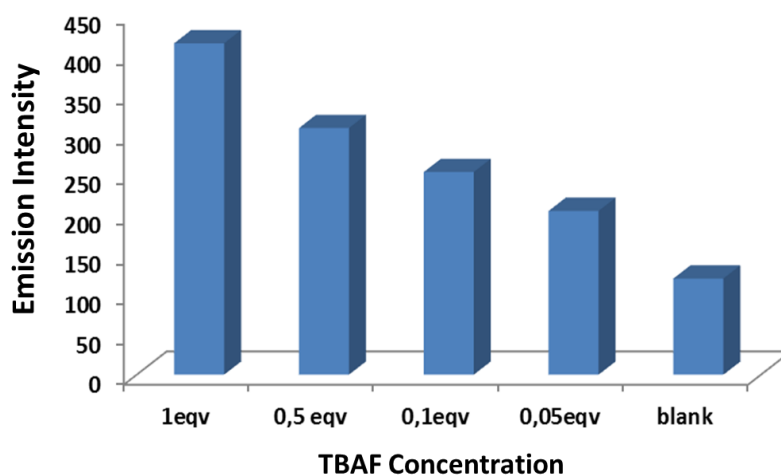

**Figure S4.** Chemiluminescence graph of compound **10** in the presence of increasing  $F^-$  concentrations. Probe concentration is  $500 \mu M$  in DMSO/Buffer (95/5 for pH 9, 20mM  $Na_2CO_3$ - $NaHCO_3$  buffer). [The blank was shown in green line and chemiluminescence was recorded subsequent to the addition of TBAF].

## Detection Limit Measurements

---

The detection limit for probe and reference compound was calculated based on chemiluminescence titration. In order to determine the S/N ratio, the chemiluminescence emission intensity of the blanks without  $F^-$  was measured 10 times and standard deviation of these blanks was calculated. Chemiluminescence emission intensities of the probe in the presence of  $F^-$  ions were plotted as a concentration of  $F^-$  in order to determine the slopes. The linear relationship between emission intensity and  $F^-$  concentration were determined and detection limits were calculated according to the equation,

$$\text{Detection limit: } 3\sigma/m$$

where  $\sigma$  represents the standard deviation of the blank measurements,  $m$  represents the slope between intensity versus sample concentration.

Detection Limit was calculated for compound **10** in DMSO as  $1,810 \times 10^{-4}$  M ( $\sigma=0,063766$ ,  $m=1056,6$ )

Detection Limit was calculated for compound **10** in DMSO/Buffer (95/5 for pH 9, 20mM  $Na_2CO_3^-$ - $NaHCO_3$  buffer) as  $17,69 \times 10^{-3}$  ( $\sigma=1,141969$ ,  $m=193,64$ ).

# $^1\text{H-NMR}$ and $^{13}\text{C-NMR}$ Spectra of the Synthesized Compounds

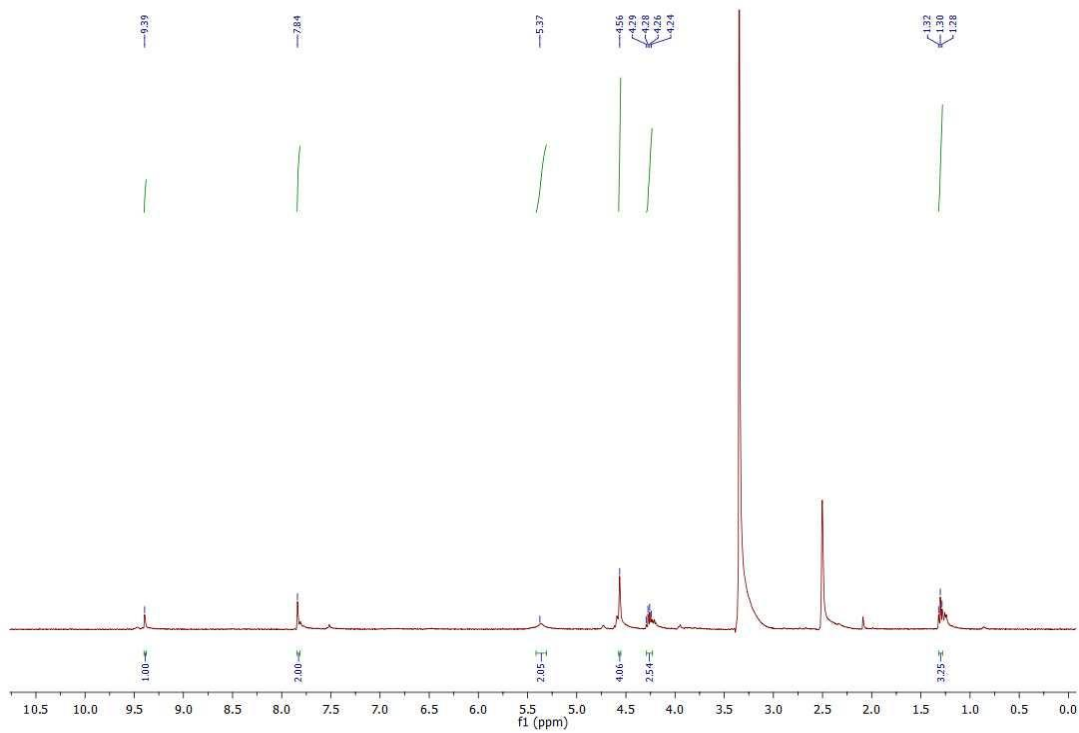

Figure S5.  $^1\text{H-NMR}$  Spectrum of Compound 2

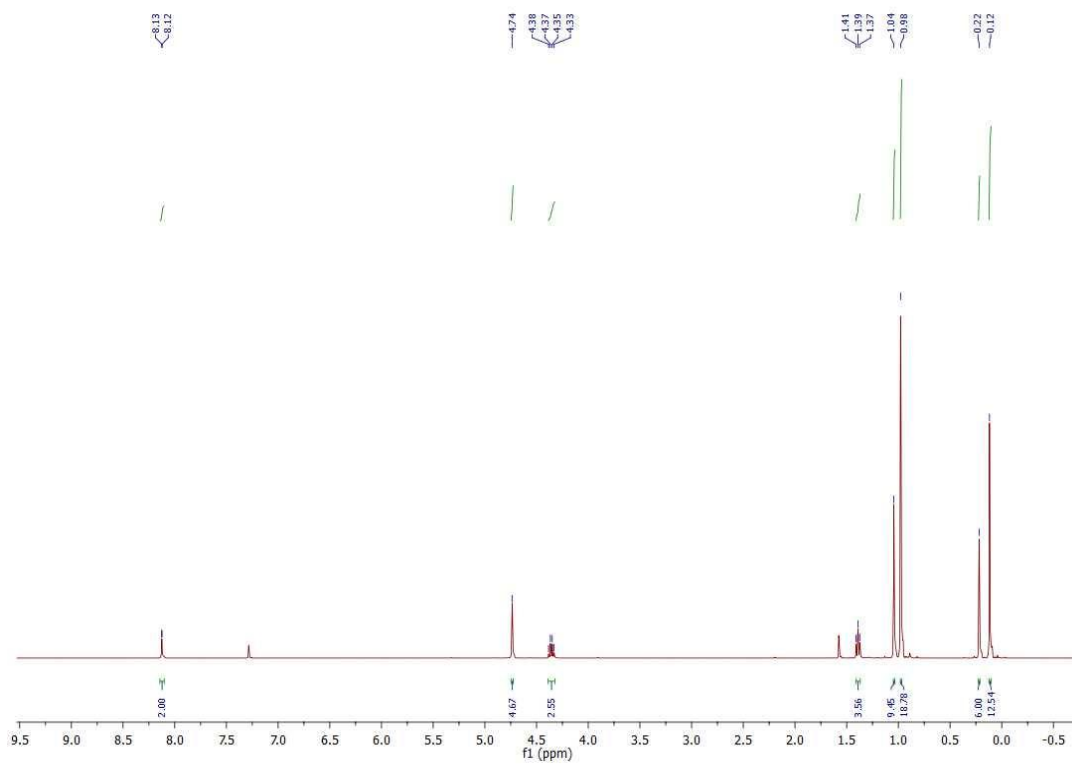

Figure S6.  $^1\text{H-NMR}$  Spectrum of Compound 3

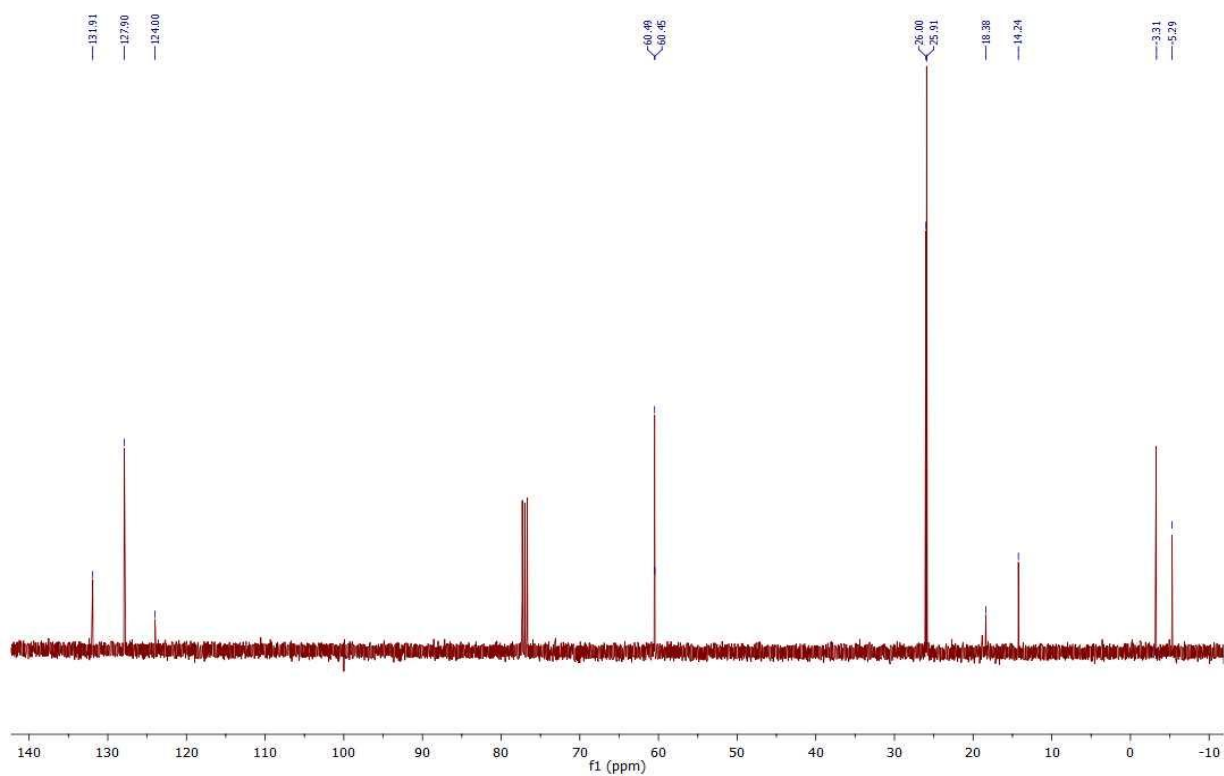

Figure S7.  $^{13}\text{C}$ -NMR Spectrum of Compound 3

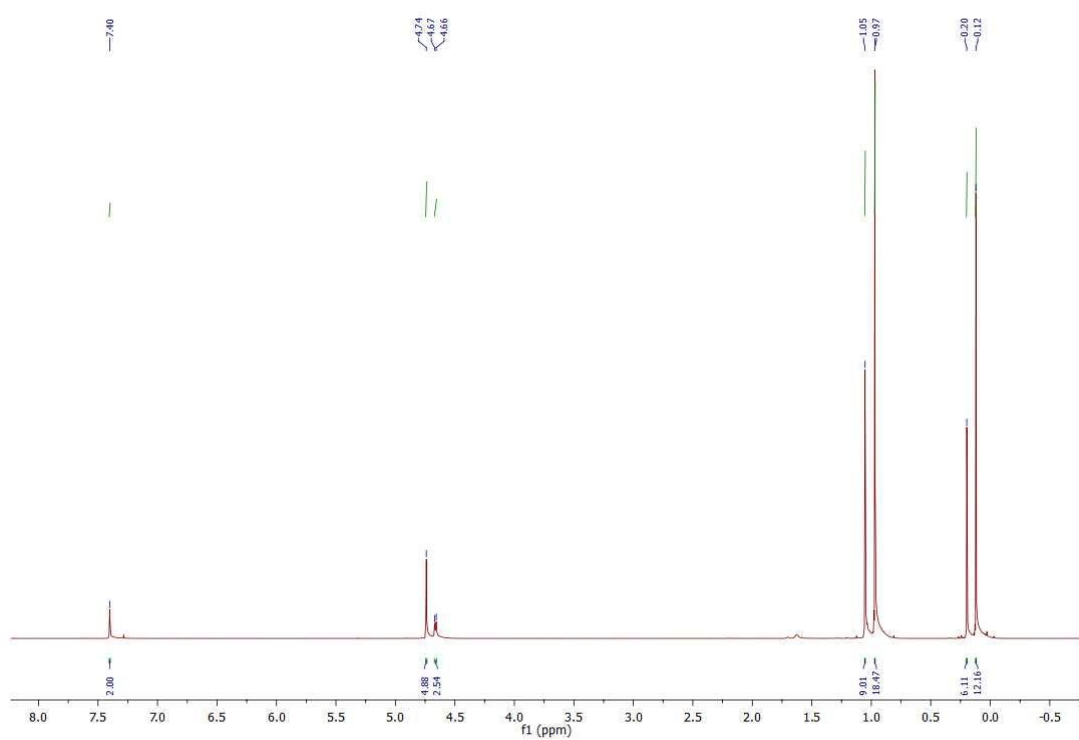

Figure S8.  $^1\text{H}$ -NMR Spectrum of Compound 4

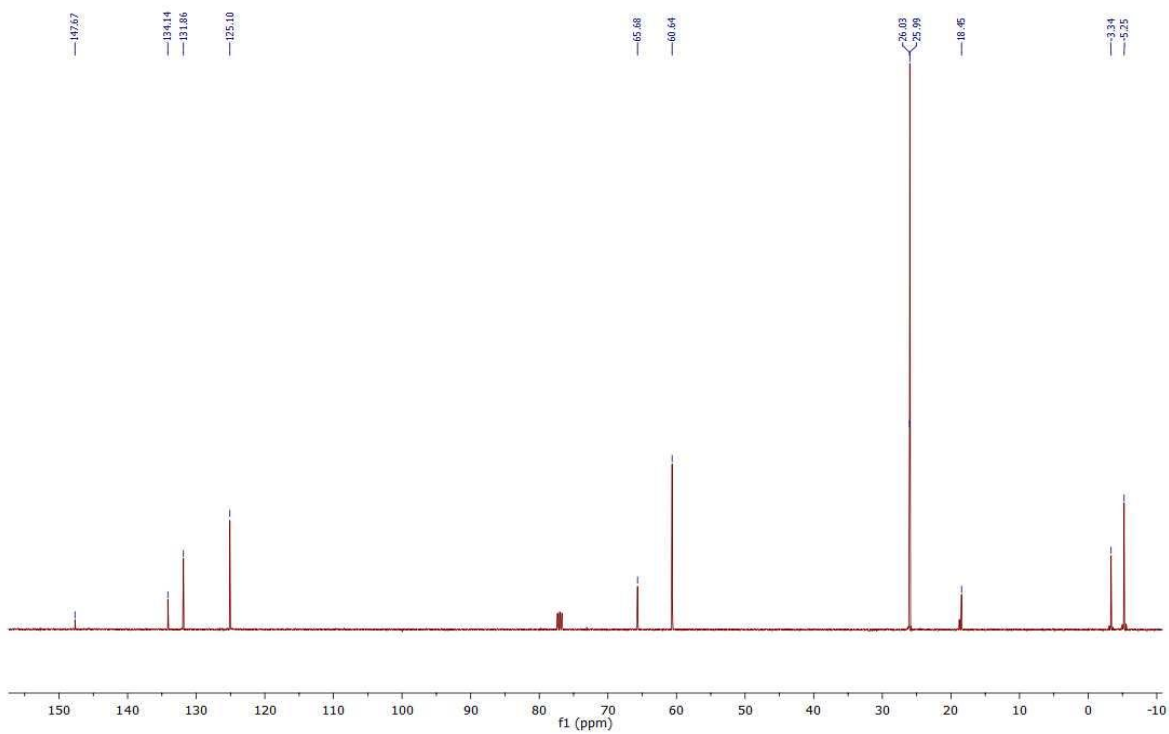

Figure S9.  $^{13}\text{C}$ -NMR Spectrum of Compound 4

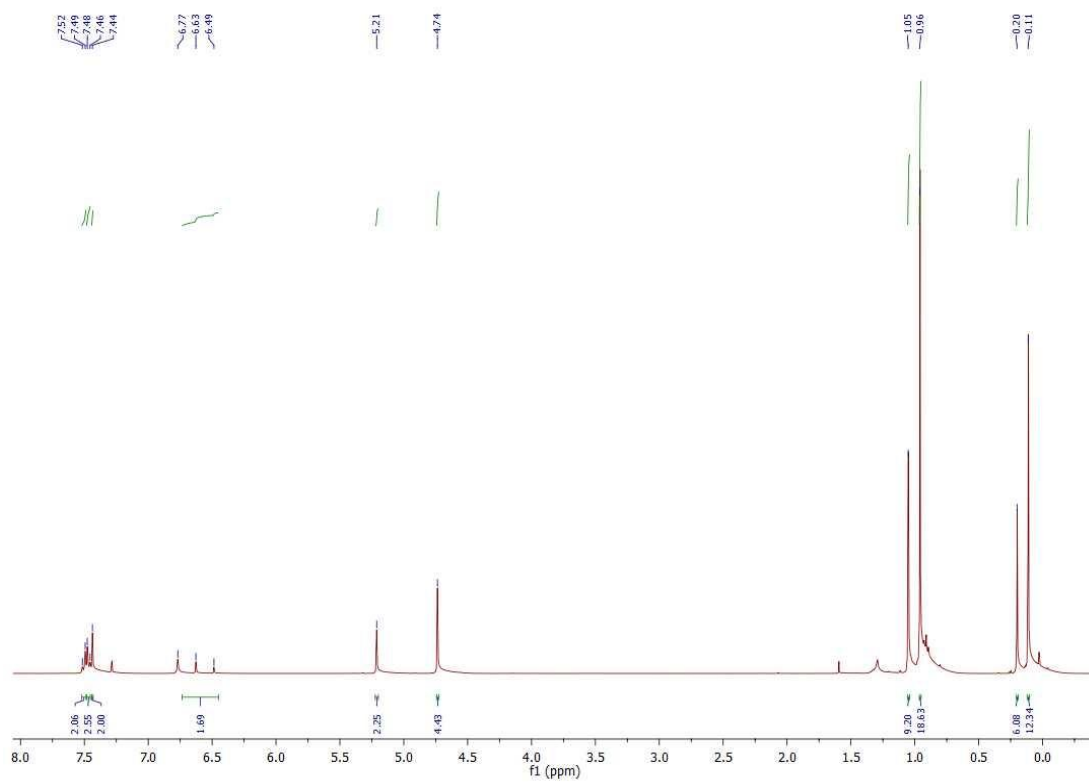

Figure S10.  $^1\text{H}$ -NMR Spectrum of Compound 5

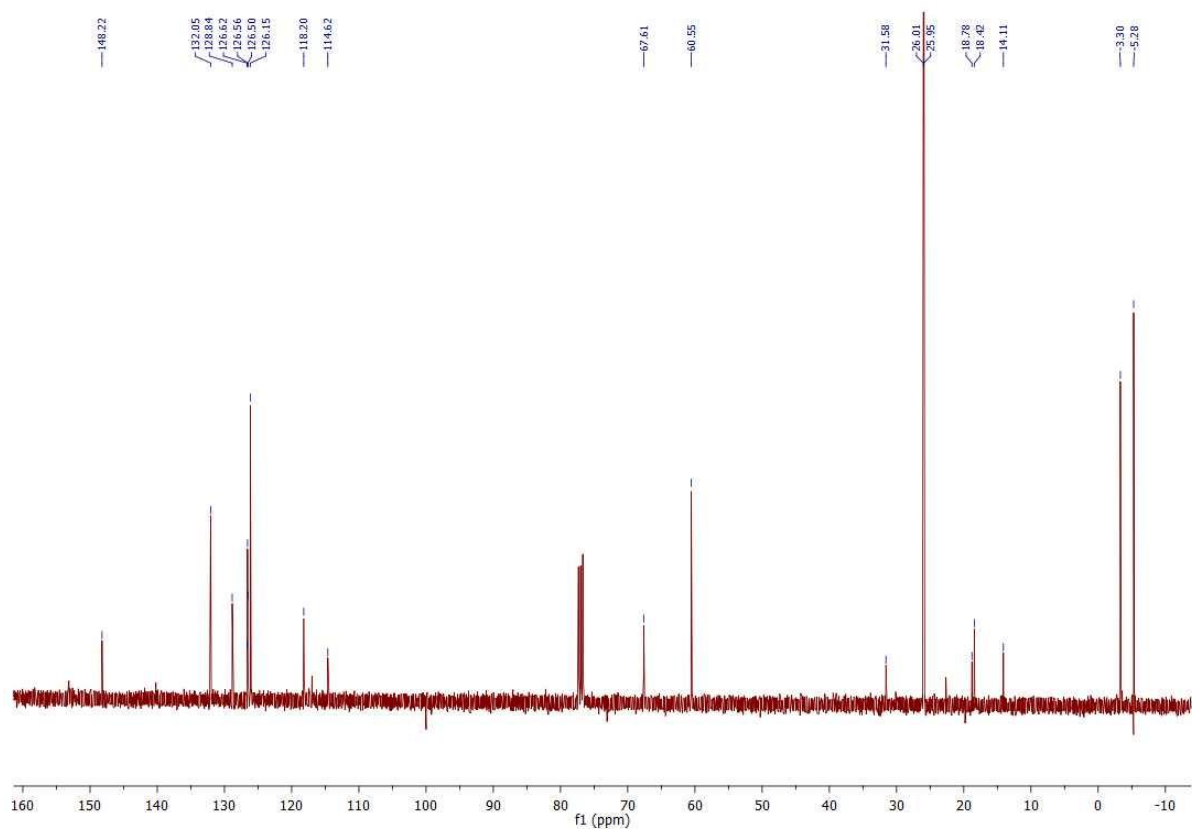

Figure S11. <sup>13</sup>C-NMR Spectrum of Compound 5

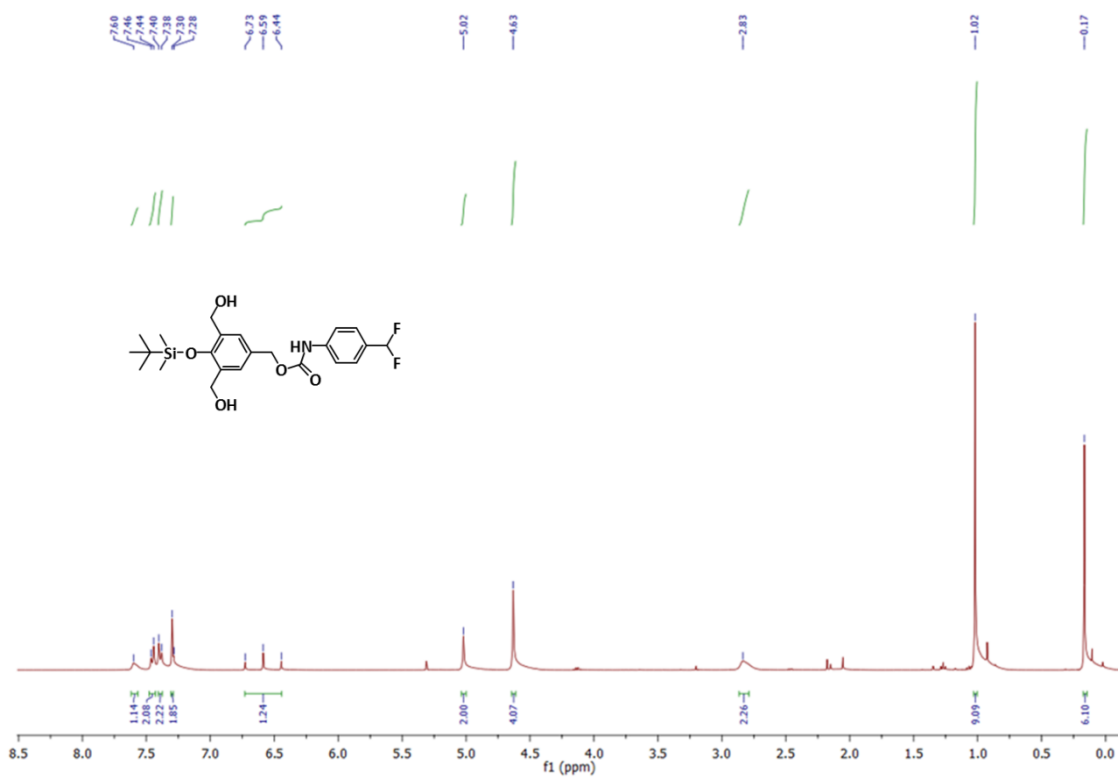

Figure S12. <sup>1</sup>H-NMR Spectrum of Compound 6



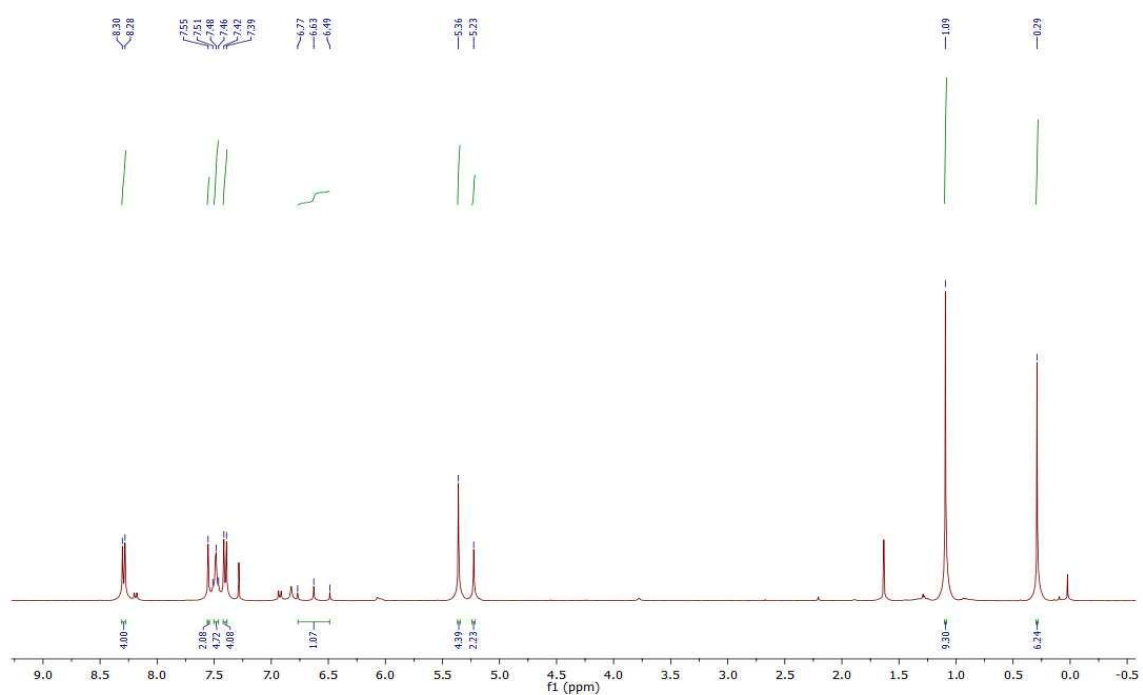

**Figure S13.**  $^1\text{H-NMR}$  Spectrum of Compound **7**

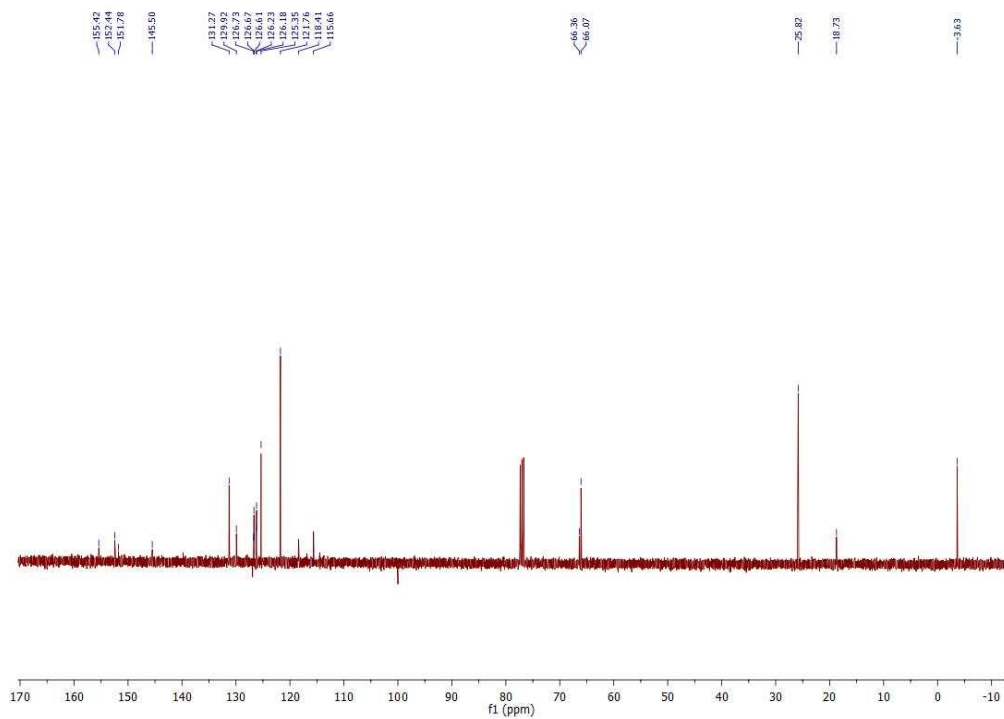

**Figure S14.**  $^{13}\text{C-NMR}$  Spectrum of Compound **7**

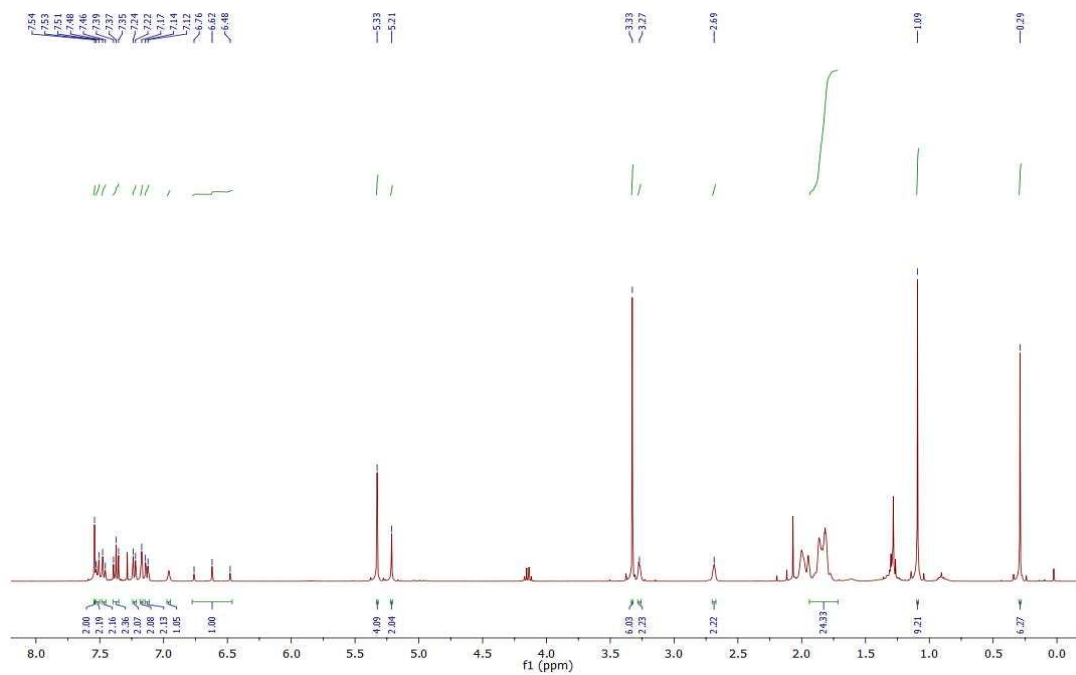

Figure S15.  $^1\text{H}$ -NMR Spectrum of Compound 9

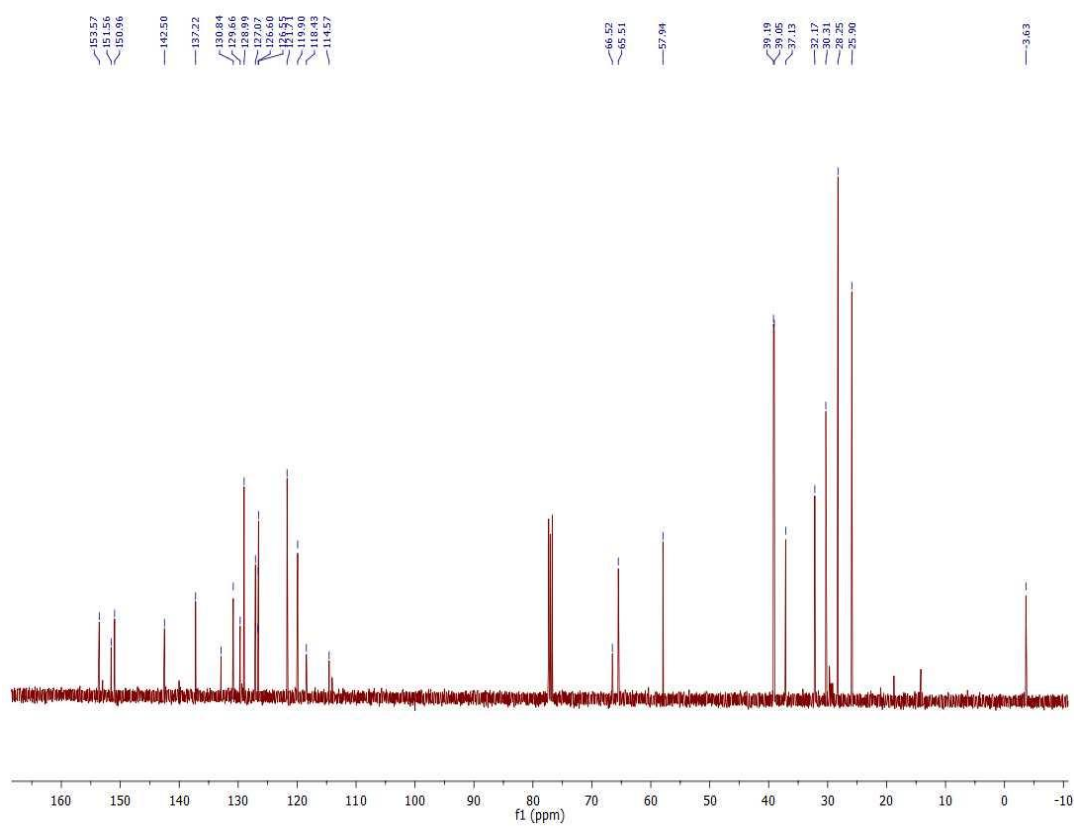

Figure S16.  $^{13}\text{C}$ -NMR Spectrum of Compound 9

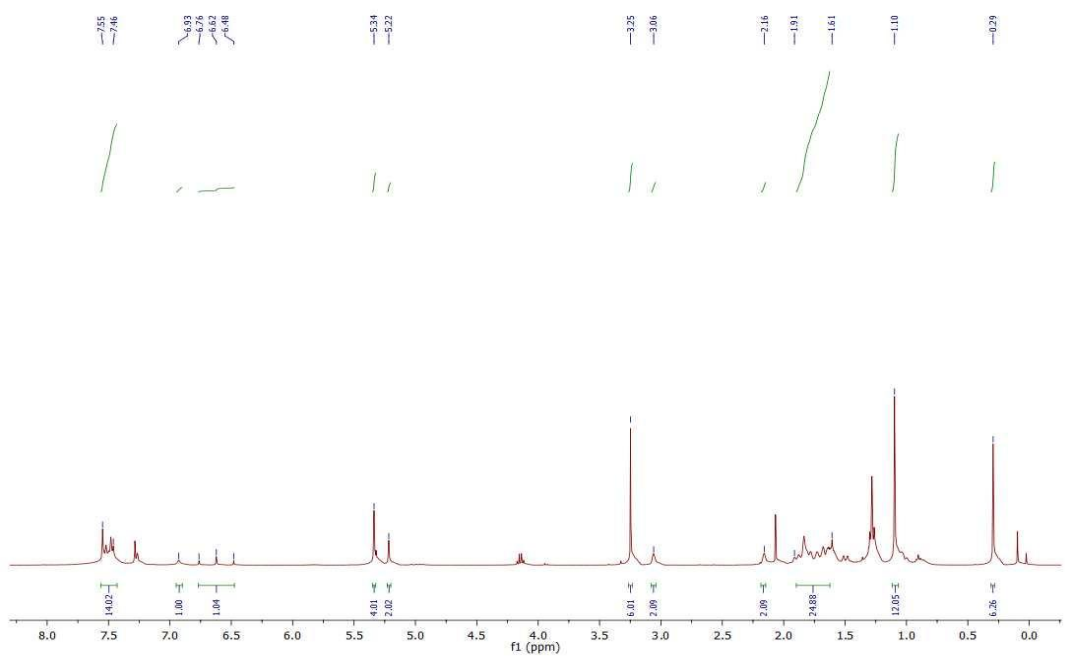

Figure S17.  $^1\text{H}$ -NMR Spectrum of Compound 10

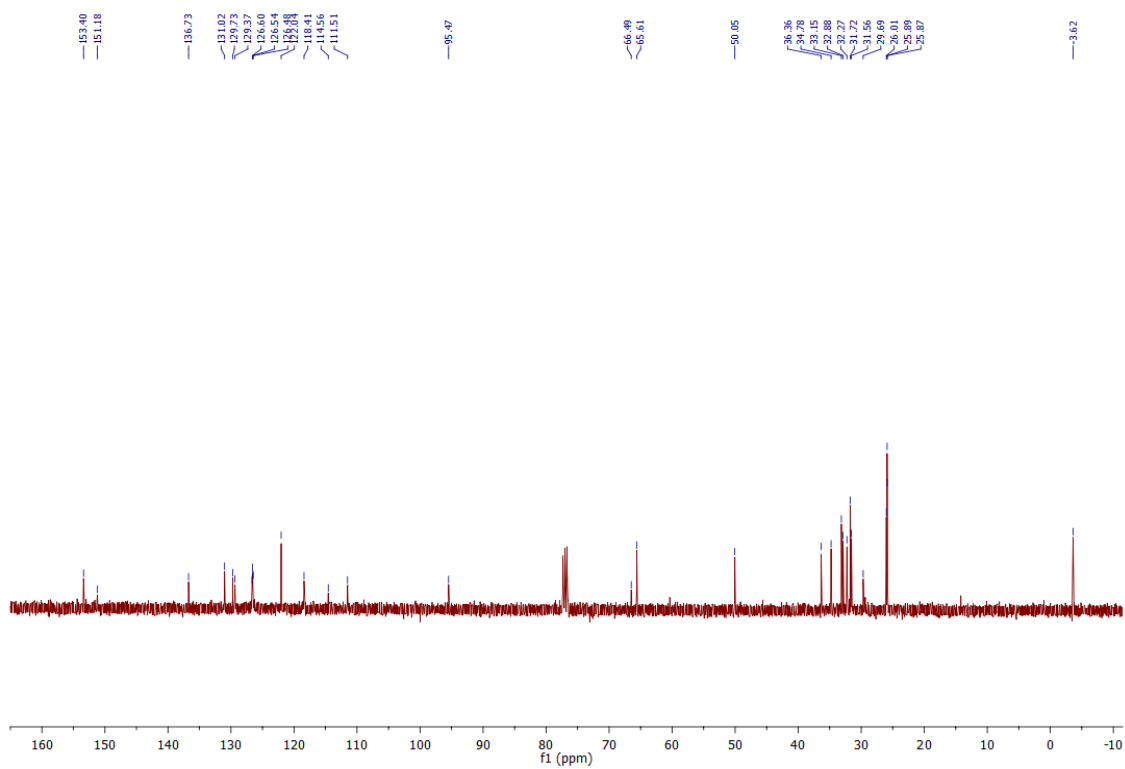

Figure S18.  $^{13}\text{C}$ -NMR Spectrum of Compound 10

## HRMs Spectra of Synthesized Compounds

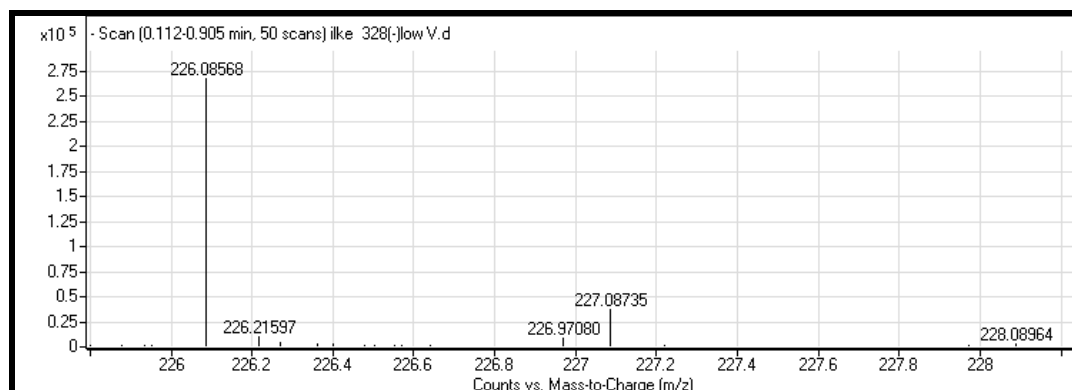

Figure S19. HRMs Spectrum of Compound 2

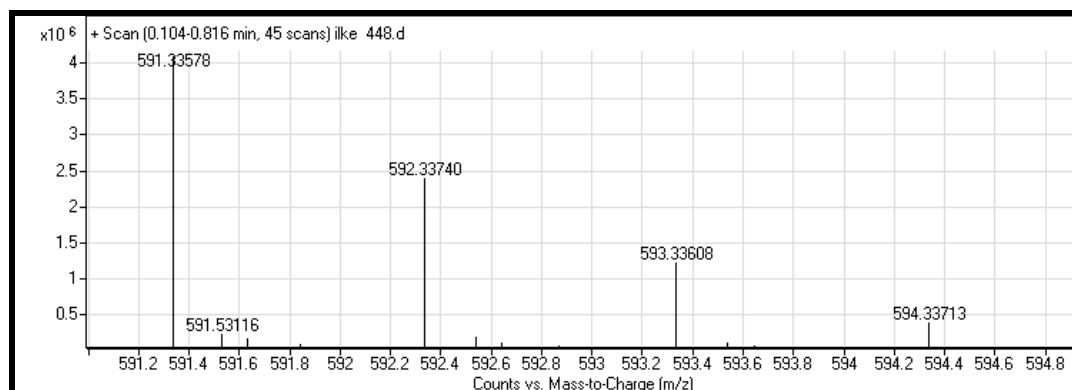

Figure S20. HRMs Spectrum of Compound 3

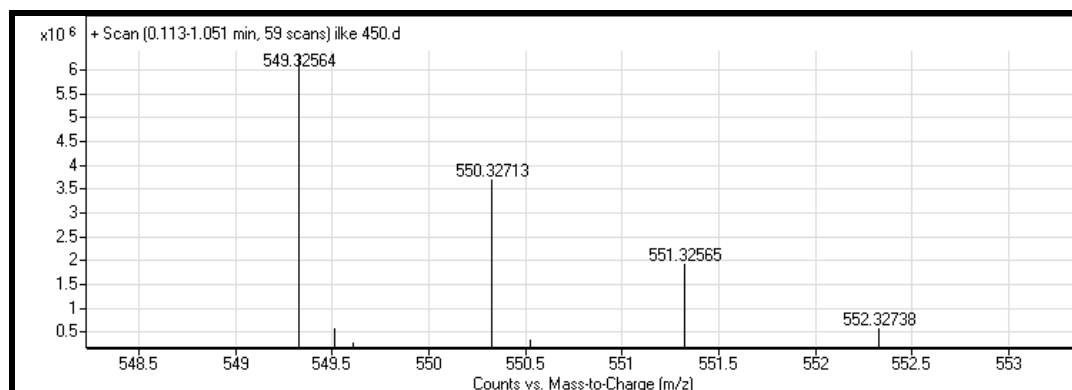

Figure S21. HRMs Spectrum of Compound 4

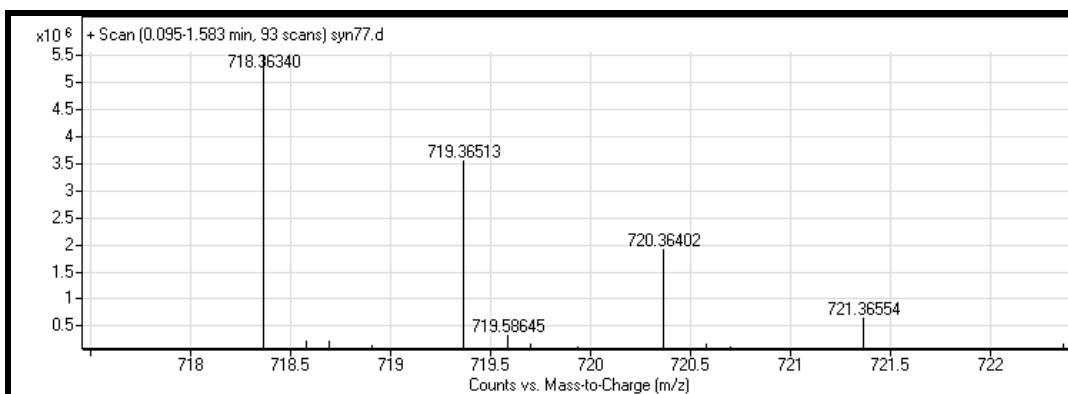

**Figure S22.** HRMs Spectrum of Compound 5

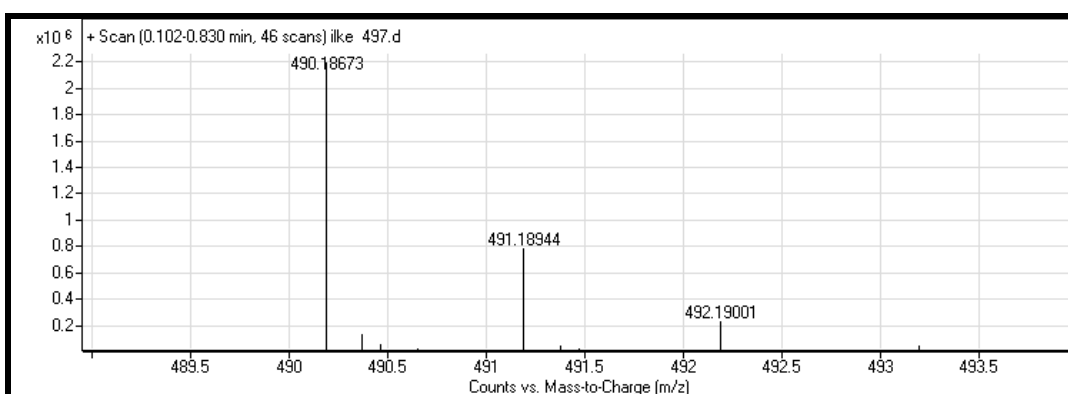

**Figure S23.** HRMs Spectrum of Compound 6

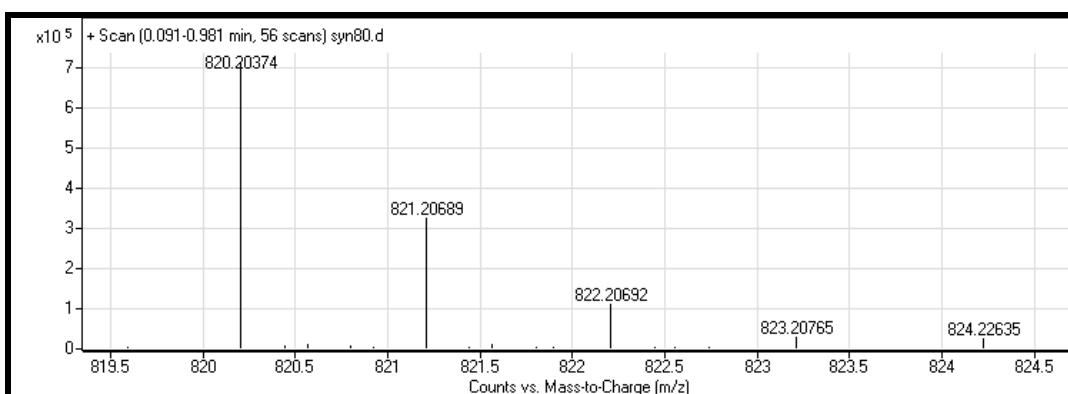

**Figure S24.** HRMs Spectrum of Compound 7

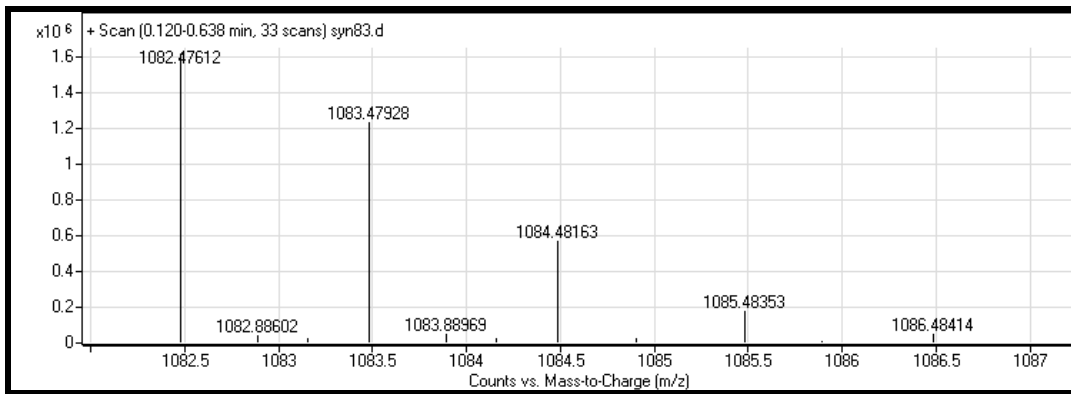

**Figure S25.** HRMs Spectrum of Compound **9**
